# Supplementary material for: The Slavcleft: a three-center study of the outcome of treatment of cleft lip and palate. Nasolabial appearance
Source: PeerJ. 2021 Feb 9;9:e10631. doi: 10.7717/peerj.10631 (PMC7879938; doi:10.7717/peerj.10631)
Supplement: Supplemental Information 1 [file peerj-09-10631-s001.xlsx]

## Sheet: en face
Patiet o	Lay rater 1	Lay rater 2	Lay rater 3	Lay rater 4	Lay rater 5	Lay rater 6	Lay rater 7	Lay rater 8	Lay rater 9	Lay rater 10	Specialist 1	Specialist 2	Specialist 3	Specialist 4	Specialist 5	Specialist 6	Specialist 7
2	100	70	90	70	60	80	80	90	70	80	140	120	110	145	100	80	120
7	150	150	130	110	120	180	170	120	90	120	160	199	140	140	160	140	120
8	120	60	95	80	90	90	100	105	50	100	60	80	95	110	95	95	110
9	110	60	90	80	70	110	90	88	130	100	75	130	95	125	83	90	70
11	110	65	85	70	75	90	75	98	90	90			100	100	100
12	160	85	98	90	100	140	120	120	90	100	50	70	90	90	98	90	50
13	100	70	80	80	65	90	80	94	60	80	65	100	85	120	88	85	80
14	180	90	115	90	115	120	100	140	110	110	55	80	80	80	77	75	110
15	40	70	105	80	85	90	85	90	80	90	80	100	70	150	77	65	110
17	80	70	90	90	65	80	110	80	70	70	85	70	105	110	82	80	70
22	120	70	97	90	80	90	80	105	60	90	45	80	80	110	79	70	80
23	60	65	75	60	80	80	70	70	70	90	80	80	84	115	80	80	70
25	100	80	95	70	95	100	90	80	70	100	75	90	95.9	120	90	90	120
26	80	55	80	90	80	110	80	85	60	120	100	80	85	120	105	80	80
27	70	70	90	60	90	80	75	89	50	90	35	65	82	70	75	85	40
29	110	70	95	70	85	120	80	99	60	80	140	150	110	140	130	85	110
30	80	70	85	90	75	90	75	98	90	100	90	100	92	115	80	80	80
33	50	60	80	80	60	70	70	60	60	80	85	30	70	60	80	75	70
34	90	70	70	80	80	100	75	103	70	80	35	70	85	104	83	75	50
36	110	75	85	60	70	80	85	102	50	90	90	120	105	130	102	95	110
37	110	70	90	80	70	100	60	78	50	70	120	70	95	110	68	100	60
41	190	95	102	120	110	120	110	130	130	110	55	80	95	115	97	85	90
42	100	70	95	110	80	90	95	98	90	80	110	100	95	130	105	90	60
45	100	70	100	60	75	80	65	95	60	90	60	60	87	90	87	60	110
48	110	80	90	90	85	100	80	101	90	80	60	100	95	110	90	85	60
50	70	80	70	90	70	110	70	99	50	100	170	195	140.5	145	160	105	140
51	80	65	80	70	50	60	90	78	50	90	50	30	90	120	79	80	70
52	120	80	95	90	85	100	90	120	120	100	70	90	80	135	99	85	90
55	90	70	85	60	95	110	90	101	90	90	100	90	101	130	108	95	100
57	60	70	75	60	85	90	80	80	50	80	110	160	135	115	93	75	110
59	140	120	100	110	90	100	90	101	130	90	90	100	90	130	80	100	100
62	140	75	95	80	100	90	90	94	80	90	80	85	86	130	89	90	100
63	120	70	105	70	95	110	90	102	90	100	75	180	103	140	103	95	90
64	80	80	90	60	90	100	85	75	70	100	100	105	100	140	93	95	70
65	80	80	90	70	85	90	95	83	70	100	85	105	98	110	92	70	60
66	100	75	95	120	65	100	110	115	110	100	110	115	95	120	80	85	120
67	120	85	90	60	95	100	90	104	80	100	40	70	95	130	85	70	80
68	90	70	90	80	90	80	80	93	70	90	80	80	102	120	99	90	100
69	70	70	79	50	70	60	80	85	60	60	75	80	105	100	101	105	80
70	30	65	70	40	50	70	60	90	50	60	60	90	99	100	112	85	80
72	40	70	80	70	85	90	70	98	50	100	50	80	95	102	83	85	80
73	100	90	98	70	75	90	85	92	110	90	65	90	99	110	87	100	60
74	80	70	95	70	80	100	85	84	80	90	135	120	120	115	110	95	80
75	60	65	85	50	85	90	80	92	60	80	65	120	99	90	100	90	110
77	50	75	85	50	65	90	80	94	50	90	120	90	105	120	108	110	80
78	110	80	90	80	95	90	85	120	70	100	110	120	100	90	97	95	120
79	120	120	100	90	90	120	130	105	120	110	140	130	140	140	160	105	120
81	150	70	100	90	85	90	100	105	110	90	25	65	90	120	76	90	40
82	80	75	90	90	65	100	70	70	70	80	80	150	98	115	89	85	120
83	60	80	90	80	70	90	80	90	90	110	120	120	105	130	98	75	130
84	90	55	85	70	60	80	80	75	60	90	60	80	85	70	91	110	40
85	160	80	130	90	100	100	10	130	120	100	140	120	100	110	157	130	80
86	110	80	90	130	100	110	85	110	70	120	130	135	100	130	61	110	90
87	130	70	95	80	80	80	90	98	90	90	85	100	98	125	97	90	90
89	80	75	75	70	60	70	70	105	60	70	80	130	95	120	99	85	120
90	130	90	90	110	75	110	120	103	110	90	65	110	98	130	97	85	100
91	90	75	92	60	80	90	75	101	90	90	140	180	115	130	115	90	140
92	70	55	85	50	55	60	95	70	70	90	75	20	85	80	65	60	65
93	80	75	90	110	80	110	85	98	80	100	85	120	103.5	130	129	100	90
94	70	70	88	70	75	70	85	98	70	90	95	90	98	130	100	95	90
95	60	55	85	80	80	100	90	95	80	80	70	70	82	120	90	70	100
96	130	70	95	80	90	110	100	110	90	100	100	115	95	110	120	110	90
97	120	70	80	60	70	80	95	93	110	90	70	110	90	110	73	90	60
98	80	70	85	50	60	60	80	85	70	70	70	100	98	103	96	90	100
99	90	70	90	70		100	110	95	70	100	50	80	85		70	60	70
100	90	65	90	60	75	90	70	78	60	80	50	105	95	110	87	95	90
101	100	90	90	90	100	100	85	118	110	110	30	40	80	145	82	80	50
102	120	70	85	60	80	100	85	98	60	80	40	60	90	70	90	60	30
103	110	80	85	80	75	80	75	110	90	90	70	70	93	130	95	70	80
104	40	55	75	50	50	80	60	70	40	80	35	35	70	60	66	60	40
105	70	60	75	60	55	70	70	70	60	80	40	100	101	110	78	90	70
107	90	80	98	70	95	110	90	85	90	90	55	175	100	110	101	100	80
108	90	75	95	90	80	100	90	99	80	90	30	70	83	70	75	80	50
109	120	70	95	60	80	90	85	90	50	90	45	100	101	90	99	95	90

## Sheet: profile
Patiet o	Lay rater 1	Lay rater 2	Lay rater 3	Lay rater 4	Lay rater 5	Lay rater 6	Lay rater 7	Lay rater 8	Lay rater 9	Lay rater 10	Specialist 1	Specialist 2	Specialist 3	Specialist 4	Specialist 5	Specialist 6	Specialist 7
2	80	70	95	120	80	100	90	85	60	80	120	120	105	110	110	70	100
7	140	180	110	110	120	180	190	130	90	150	150	200	120	140	160	120	150
8	150	80	105	110	100	110	170	125	120	120	120	190	125	170	160	120	110
9	120	70	95	120	95	100	160	92	120	130	180	190	110	115	128	90	110
11	130	70	95	110	90	120	150	105	80	130			105	80	100
12	120	90	110	90	100	180	150	120	110	140	130	180	110	110	90	90	110
13	110	90	90	130	85	90	170	102	70	100	110	130	125.5	170	121	100	80
14	170	90	120	80	120	130	150	115	120	140	90	110	120	120	96	90	140
15	90	90	110	70	110	110	110	85	90	90	80	140	105	120	65	75	120
17	90	90	95	90	85	100	130	85	90	100	115	140	90	130	103	90	80
22	130	80	97	90	90	90	100	112	80	90	75	120	105	150	85	85	110
23	120	70	85	60	70	90	90	95	80	100	130	150	110.5	110	108	95	120
25	90	90	95	80	95	100	90	90	80	100	140	180	120	145	109	105	150
26	140	70	90	120	100	120	170	105	90	100	130	110	125	140	110	90	100
27	110	80	95	80	100	80	100	103	60	110	75	85	90	70	85	80	70
29	90	80	93	90	90	100	90	99	60	90	180	150	110	140	140	105	110
30	140	80	95	120	100	110	100	104	80	160	80	110	100	103	97	85	60
33	70	80	90	80	80	120	80	95	80	100	90	30	105	90	110	110	80
34	110	85	80	110	95	110	120	110	90	110	70	100	115	130	104	105	90
36	110	90	92	80	85	90	100	102	90	100	130	190	110	160	115	110	110
37	70	70	85	80	90	120	90	98	80	70	75	130	95	80	90	105	70
41	150	95	95	80	95	110	150	115	150	120	70	110	125	115	87	105	120
42	80	80	85	110	95	100	90	98	90	110	100	120	90	140	105	100	80
45	130	80	110	80	85	80	85	98	70	110	160	140	103	80	81	80	120
48	130	85	90	90	75	140	130	105	90	110	115	150	108	120	107	105	110
50	100	110	75	130	100	120	90	99	80	130	95	130	120	120	83	95	120
51	110	80	90	70	80	80	100	80	80	100	80	120	105	135	118	85	90
52	140	85	98	90	100	120	100	125	110	120	125	110	102	130	113	120	70
55	110	80	95	80	100	110	150	101	80	100	150	160	120	130	122	110	110
57	120	80	90	70	85	100	130	85	60	90	150	190	125	130	125	95	90
59	160	120	100	80	110	10	110	110	110	120	80	160	110	140	120	105	100
62	130	80	100	110	100	110	120	101	90	110	110	140	110	125	95	95	100
63	170	110	115	130	100	130	110	110	120	130	80	100	102	155	97	80	120
64	110	90	85	50	90	120	120	80	80	100	150	120	120	108	108	110	110
65	140	110	90	110	100	140	180	97	120	150	90	140	102	110	90	85	110
66	150	80	95	80	85	110	110	90	110	110	120	120	115	80	150	80	140
67	140	95	97	90	100	120	130	101	90	150	120	90	98	140	80	80	70
68	100	70	80	110	90	100	100	101	70	90	150	130	110	130	105	110	120
69	90	70	84	60	75	80	100	91	50	90	95	100	95	85	97	85	60
70	80	70	70	40	60	80	110	90	50	60	140	130	105	50	120	105	120
72	80	90	95	80	95	120	120	102	90	100	110	115	108	120	103	105	70
73	150	95	102	110	90	90	110	92	90	110	130	120	105	130	104	105	110
74	130	90	98	120	100	100	110	95	110	120	190	130	130	130	130	120	150
75	120	70	95	50	90	90	90	94	70	100	80	110	103	40	100	85	90
77	110	90	95	110	100	130	150	101	70	90	150	100	115	105	102	105	110
78	150	90	130	90	100	150	140	120	110	180	130	130	110	110	92	105	130
79	180	150	110	90	100	150	180	110	160	150	160	160	140	140	160	115	120
81	160	80	95	120	90	120	110	110	90	90	110	120	99.2	70	98	80	110
82	110	80	90	90	85	110	90	95	80	110	120	170	105	120	107	95	120
83	80	80	100	110	90	120	150	95	80	130	150	120	120	110	130	90	130
84	90	90	95	70	90	90	100	80	50	120	100	110	105	135	75	90	80
85	180	90	140	110	110	140	180	140	130	150	160	185	130	150	167	130	110
86	170	90	115	130	100	120	180	115	110	180	170	135	100	160	80	120	90
87	180	75	97	110	100	110	130	105	80	120	135	120	115	115	108	105	120
89	120	90	77	90	75	100	110	110	110	100	140	150	112	120	110	70	120
90	90	90	85	110	80	110	130	101	110	100	120	130	102	120	96	95	120
91	80	75	90	110	90	90	100	99	90	90	180	175	130	130	125	130	180
92	60	70	90	70	80	80	100	90	70	80	110	120	105	90	80	80	90
93	110	80	130	110	90	90	110	120	70	140	150	130	113	110	109	110	120
94	80	75	87	90	85	70	100	98	80	100	125	110	120	120	100	105	110
95	80	60	90	80	80	100	180	110	80	100	90	150	110	120	98	80	100
96	170	80	105	120	115	100	10	115	110	130	120	190	145	130	165	120	140
97	110	80	85	60	90	80	95	98	80	80	100	120	105	135	81	75	120
98	150	80	85	90	90	80	90	85	60	90	160	160	110	105	133	115	110
99	120	80	90	110	100	150	170	85	130	115	110	160	145	150	105	100	110
100	120	70	75	70	85	70	90	98	70	80	100	105	105	110	103	90	80
101	160	95	95	120	120	140	170	120	150	170	85	115	105	170	91	100	70
102	190	80	95	110	100	150	180	105	80	110	60	90	93	160	76	80	50
103	110	80	85	80	85	90	95	108	80	110	115	120	111	160	99	95	130
104	120	80	95	50	80	120	120	75	50	90	65	120	110	110	72	75	80
105	70	70	80	80	80	80	90	78	70	70	160	190	130	135	115	90	110
107	110	80	85	50	85	110	90	85	50	80	130	160	110	160	103	105	100
108	130	90	105	110	95	110	120	101	90	120	80	115	91	30	78	90	90
109	120	75	90	50	90	80	90	90	60	100	115	130	109	70	92	95	120

## Sheet: Arkusz3
Patient No	Gender (1 Male, 2 Female)	Group (1 Warsaw, 2 Prague, 3 Bratislava)	Age at lip repair	Surgeon who did lip repair	Photo Age
2	1	2	0.692676	1	10.2724
7	2	1	0.744695	2	11.3
8	1	1	0.618754	2	10.6
9	1	1	0.731006	2	12.2
11	1	1	0.62423	2	10.2
12	1	1	0.711841	2	13.3
13	1	1	0.635181	2	11.3
14	1	1
15	1	1	0.950034	2	10.1
17	1	1	0.845996	2	11.2
22	1	1	0.785763	2	11.7
23	1	1	0.668036	2	9.9
25	2	1	0.676249	2	10.1
26	2	2	0.402464	9	8.87064
27	2	1	0.824093	2	10.1
29	1	1	0.731006	2	11.2
30	1	1	0.698152	2	10.5
33	2	3	0.396988	4	7.68515
34	1	1	0.695414	2	10.8
36	2	1	1.08966	2	11.7
37	1	1	0.747433	2
41	1	1	0.668036	2	10.5
42	2	1	0.711841	2	11.9
45	2	1	0.616016	2	10.6
48	2	1	0.988364	2	7.8
50	1	1	0.785763	2	10.3
51	1	1	0.741958	2	12.2
52	2	1	0.5859	2	7.5
55	2	1	0.747433	2	12.3
57	1	1	0.676249	2	9.5
59	1	1	0.766598	2	10.9
62	1	2	0.399726	1	7.50171
63	1	2	0.566735	9	13.4428
64	1	2	0.77755	1	9.18823
65	1	2	0.375086	7	10.1629
66	1	2	0.394251	6	9.83984
67	2	2	1.28679	1	9.37166
68	2	2	2.9295	1	8.35044
69	1	2	0.418891	7	12.8843
70	1	2	0.421629	1
72	1	2	0.328542	9	8.59411
73	1	2	0.44627	7	8.55031
74	1	2	0.421629	1	8.89254
75	1	2	0.383299	6	10.6201
77	2	2	0.451745
78	1	2	0.605065	6	12.1506
79	1	2	0.47091	9	10.7077
81	1	2	0.826831	6	11.8303
82	1	1	0.637919	2	13.243
83	1	1	0.930869	2	13.6
84	2	2	0.43258	1
85	2	2	0.558522	1	10.5188
86	1	2	0.50924	6	13.462
87	2	2	0.36961	1	7.97536
89	1	3	0.533881	4	11.4962
90	1	3
91	1	3	0.536619	3	9.48939
92	2	3	0.229979	4	8.47639
93	2	3	0.276523	4	10.7105
94	1	3	0.251882	4	8.37782
95	1	3	0.232717	4	7.39493
96	1	3			7.72621
97	1	3	0.227242	4	7.94798
98	1	3	0.208077	8	9.39083
99	1	3
100	2	3	0.364134	4	9.05407
101	1	3	0.309377	4	9.82341
102	1	3	0.52293	5	4.87611
103	1	3	0.317591	4	10.1136
104	1	3	0.0246407		6.59548
105	1	1	1.31964	2	14
107	2	2	0.334018	6	9.66735
108	1	2	0.405202	6	11.5702
109	2	2	0.416153	7	8.31211
